# Supplementary material
Source: PubMed Central journal article supplement (PMC5029860)

SUPPORTING INFORMATION

**Phospholipid ozonation products activate the 5-lipoxygenase pathway in macrophages**

Karin A. Zemski Berry and Robert C. Murphy

Department of Pharmacology, University of Colorado Denver, 12801 E. 17<sup>th</sup> Ave., Mail Stop  
8303, Aurora, CO 80045

**Corresponding author**

R.C.M.; Tel: (303) 724-3352; E-mail: [Robert.Murphy@ucdenver.edu](mailto:Robert.Murphy@ucdenver.edu)

## Table of Contents

|                |   |
|----------------|---|
| Figure S1..... | 3 |
| Figure S2..... | 4 |
| Figure S3..... | 5 |
| Figure S4..... | 6 |
| Figure S5..... | 7 |
| Figure S6..... | 8 |

**Figure S1:** Dose response of the release of AA upon the addition of 16:0/9aI-PC (closed squares) and POPC (closed triangles) to resident peritoneal macrophages for 1h at 37°C. After incubation AA was analyzed by LC-MS/MS and quantified using standard isotope dilution. Results shown are averages  $\pm$  SEM (n=3) from three independent experiments. \* p< 0.05; \*\* p<0.01; \*\*\* p<0.0001.

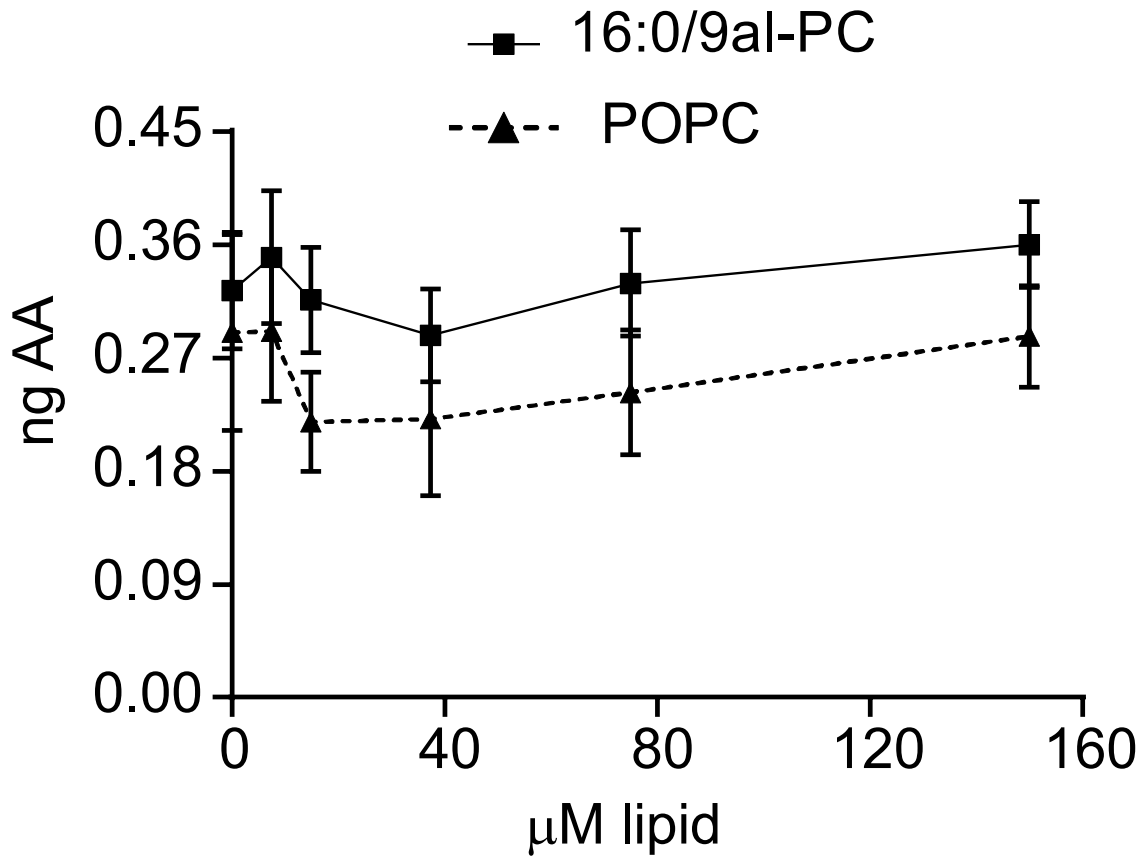

**Figure S2:** Negative ion mass spectrum of the products of POPG exposed to 3 ppm ozone for 3 minutes. The  $[M-H]^-$  of POPG at  $m/z$  747.6 disappeared after this treatment and 3 major peaks were observed as products. These products were characterized by collisionally activating each ozonization product observed and compared to fragment ions found in literature. The ozonization product at  $m/z$  637.5 was determined to be 16:0/9al-PG and the product at  $m/z$  669.5 was the methanol hemiacetal of 16:0/9al-PG. The ion present at  $m/z$  653.5 is 16:0/9COOH-PG.

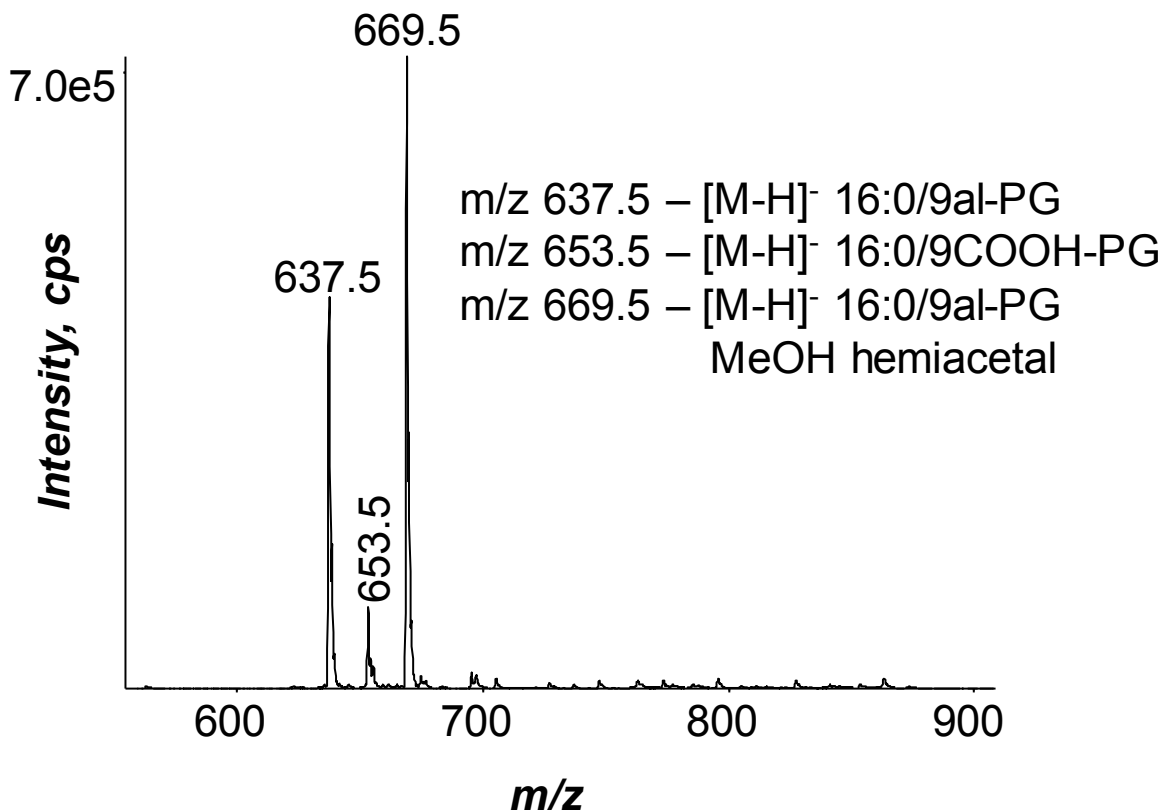

**Figure S3:** Dose response of the release of AA upon the addition of 16:0/9aI-PC (closed squares) and POPC (closed triangles) for 3 min followed by the addition of zymosan (25 particles per cell) to resident peritoneal macrophages for 1h at 37°C. After incubation, the AA was analyzed by LC-MS/MS and quantified using standard isotope dilution. Results shown are averages  $\pm$  SEM (n=3) from three independent experiments. \* p< 0.05; \*\* p<0.01; \*\*\* p<0.0001.

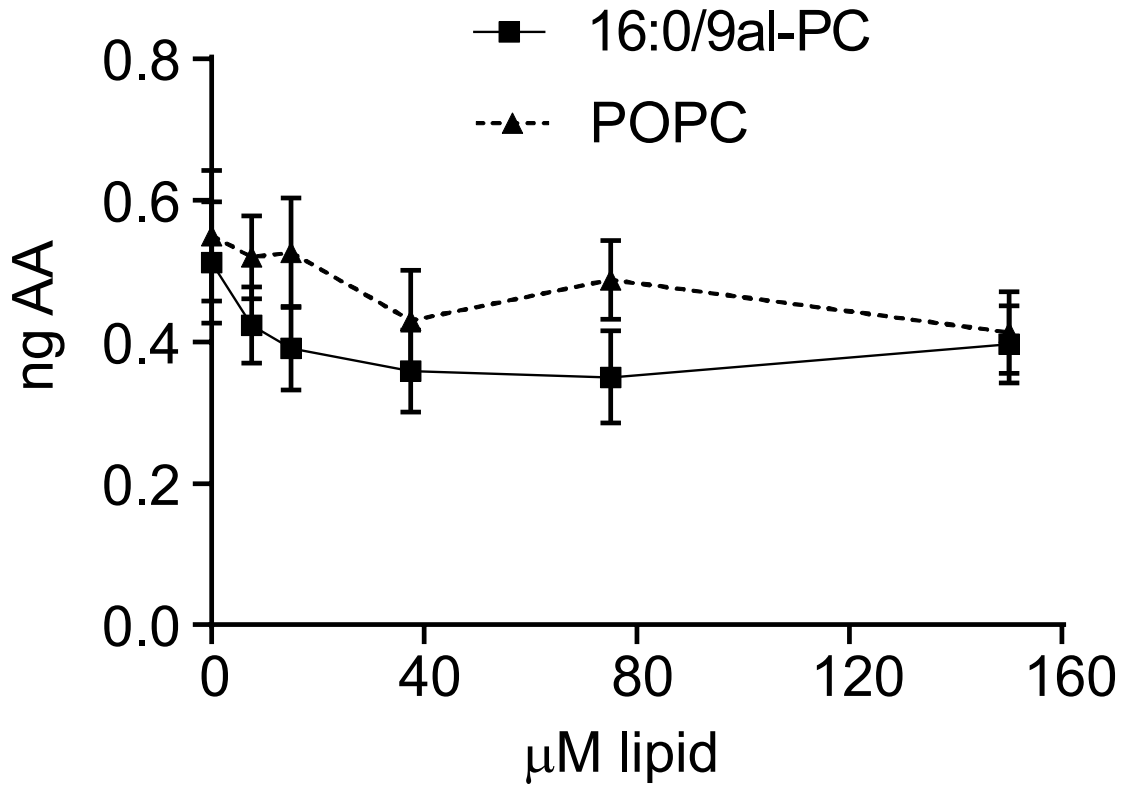

**Figure S4:** Time course of the production of A) 5-LO products (LTC<sub>4</sub>, 6-*trans*-LTB<sub>4</sub>, LTB<sub>4</sub>, and 5-HETE) and B) COX products (PGE<sub>2</sub> and TXB<sub>2</sub>) with the addition of 16:0/9a1-PC (37.5 μM) to resident peritoneal macrophages either before, after, or at the same time as zymosan (25 particles per cell) for 1h at 37°C. After incubation, the eicosanoids (LTC<sub>4</sub>, 6-*trans*-LTB<sub>4</sub>, LTB<sub>4</sub>, 5-HETE, PGE<sub>2</sub>, and TXB<sub>2</sub>) were analyzed by LC-MS/MS and quantified using standard isotope dilution. Results shown are averages ± SEM (n=3) from three independent experiments. \* p< 0.05; \*\* p<0.01; \*\*\* p<0.0001.

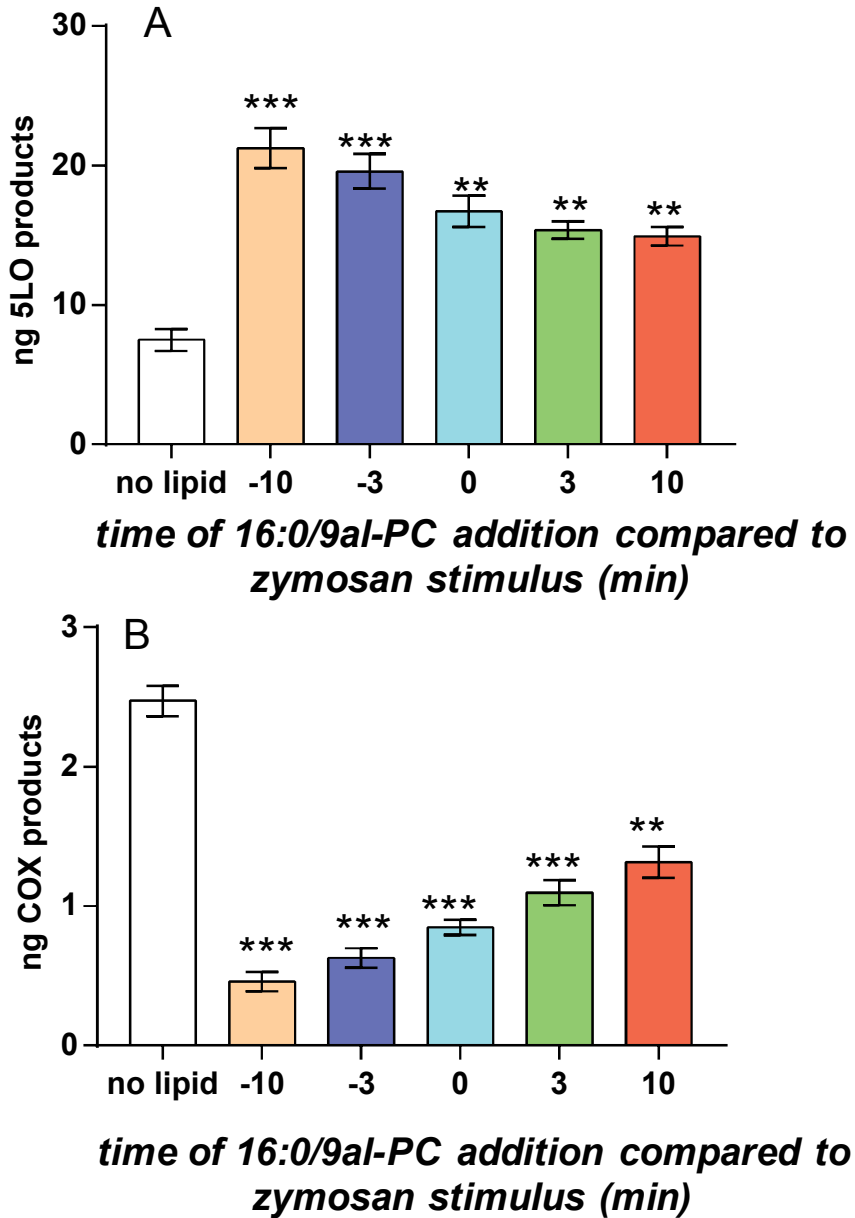

**Figure S5:** The effect of 16:0/9a1-PC on intracellular calcium levels was examined in cells isolated from the peritoneal cavity loaded with indo-1 AM. Stimulation with PAF (100 nM) induced transient calcium flux, but no calcium flux was initiated by 16:0/9a1-PC (7.5-75  $\mu$ M). The arrow indicates when stimulus was added. The calcium flux was determined by monitoring the change in indo2/indo1 fluorescence. This response is representative of three experiments.

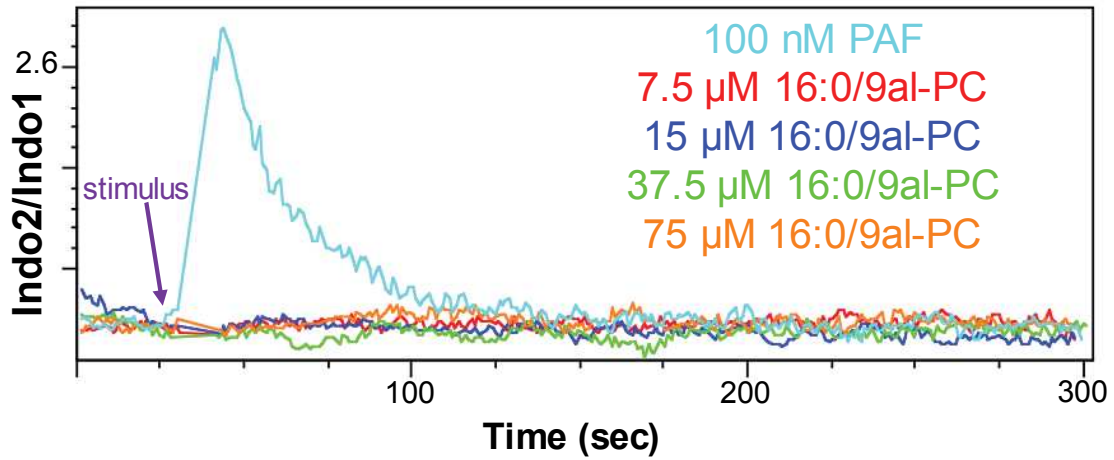

**Figure S6:** Production of 5-LO products (LTC<sub>4</sub>, 6-*trans*-LTB<sub>4</sub>, LTB<sub>4</sub>, and 5-HETE) in resident peritoneal macrophages after a 30 min incubation at 37°C with zymosan (25 particles per cell), 16:0/9al-PC (37.5 μM), or 16:0/9al-PC and zymosan (25 particles per cell). After incubation, the eicosanoids (LTC<sub>4</sub>, 6-*trans*-LTB<sub>4</sub>, LTB<sub>4</sub>, and 5-HETE) were analyzed by LC-MS/MS and quantified using standard isotope dilution. Results shown are averages ± SEM (n=3) from three independent experiments. \* p< 0.05; \*\* p<0.01; \*\*\* p<0.0001.

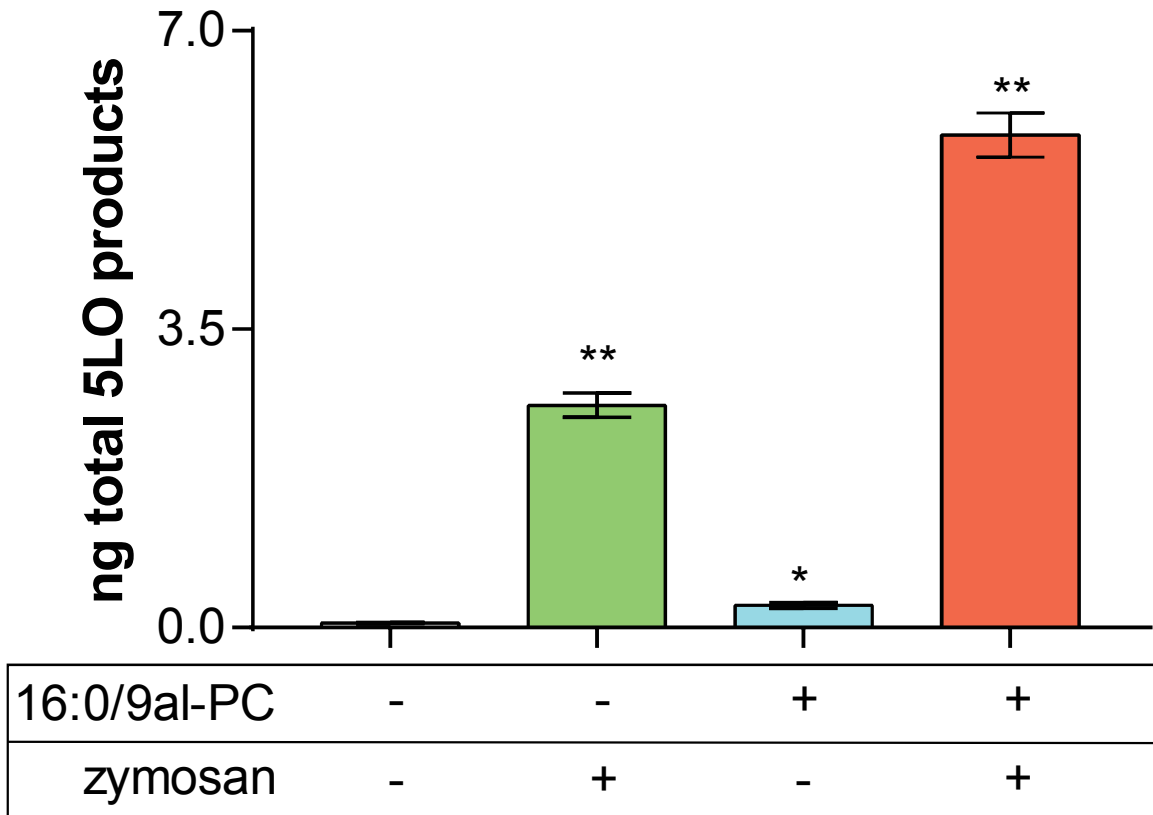

Supplement: NIHMS812791-supplement-Supplemental.pdf [file NIHMS812791-supplement-Supplemental.pdf]
